# Supplementary material for: Simultaneous Removal of the Freshwater Bloom-Forming Cyanobacterium Microcystis and Cyanotoxin Microcystins via Combined Use of Algicidal Bacterial Filtrate and the Microcystin-Degrading Enzymatic Agent, MlrA
Source: MDPI journal article supplement (doi:10.3390/microorganisms9081594), 2021-07-27
Supplement: s1 [file s1]

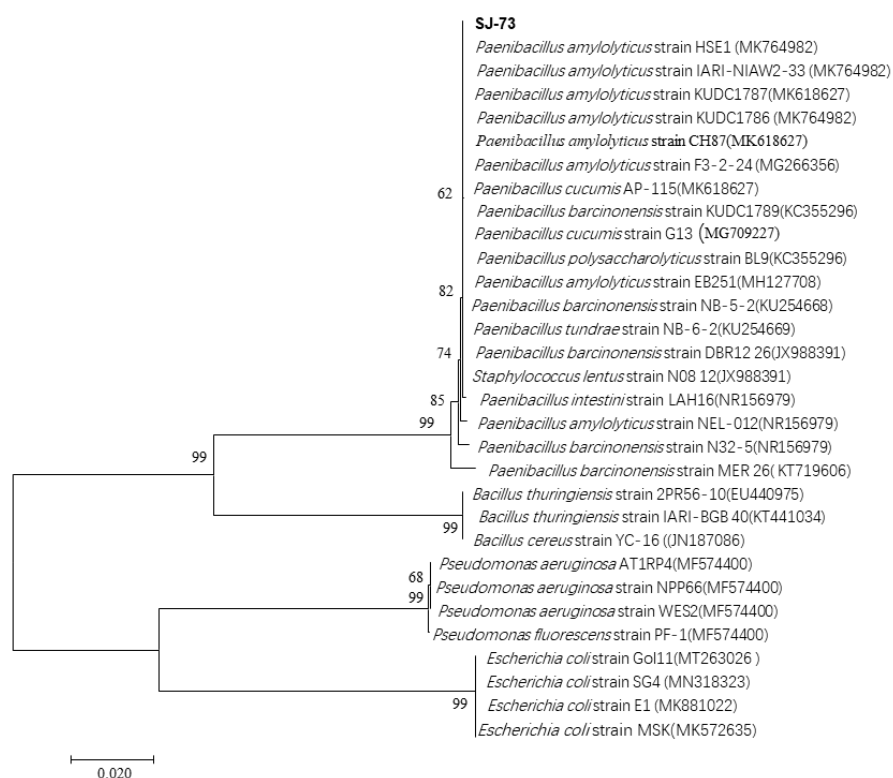

**Figure S1.** Phylogenetic tree based on bacterial 16S rDNA sequence of the isolated algicidal bacterium SJ-73 and closely related members. Tree topology shown is from Neighbor-joining analysis. Scale bar represents 0.020 nucleotide substitution per position.

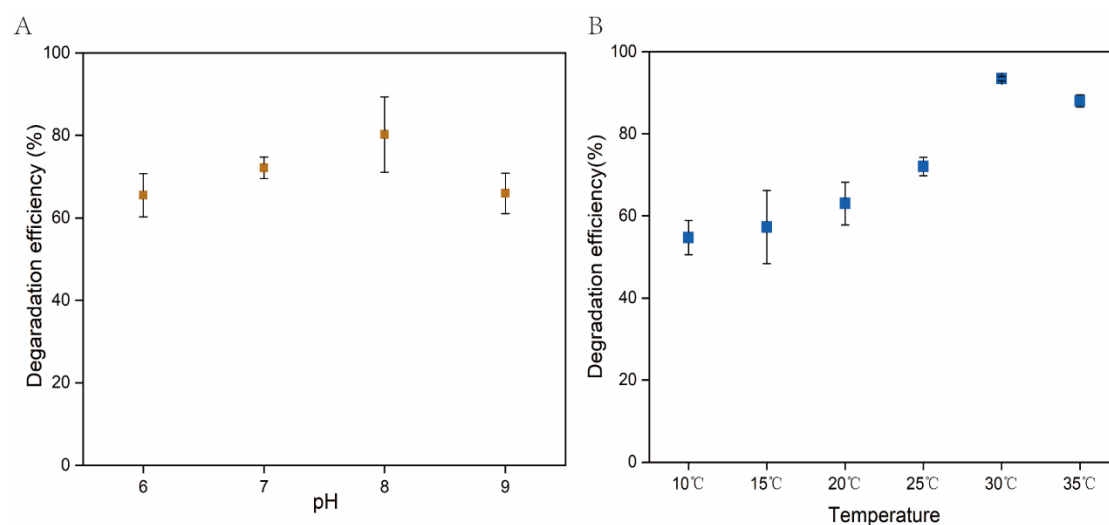

**Figure S2.** Influences of reaction pH (A) and temperature (B) on the activity of MlrA.

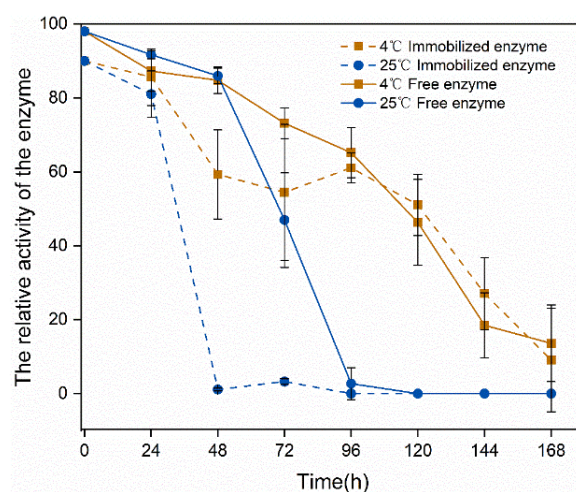

**Figure S3.** The relative activity of the immobilized and free enzyme at different storage temperature (4°C and 25°C). Bars represent the standard errors of the means for triplicate.

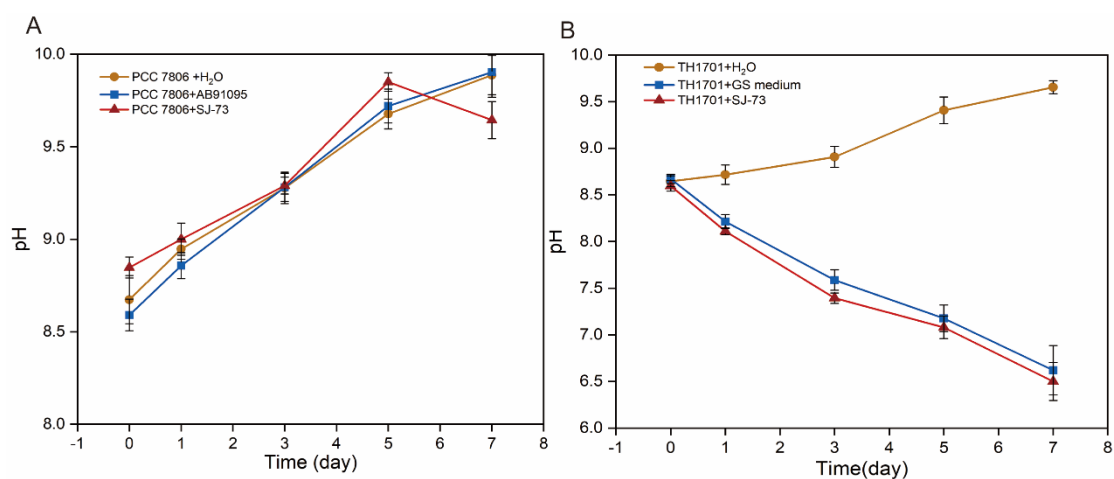

**Figure S4.** Variations of pH in *M. aeruginosa* PCC 7806 (A) and colonial *M. aeruginosa* TH1701 (B) cultures treated with bacterium SJ-73 filtrates for 7 days.
